# Supplementary material for: A molecular view of amyotrophic lateral sclerosis through the lens of interaction network modules
Source: PLoS One. 2022 May 16;17(5):e0268159. doi: 10.1371/journal.pone.0268159 (PMC9109932; doi:10.1371/journal.pone.0268159)
Supplement: S1 Table — (XLSX) [file pone.0268159.s001.xlsx]

## Sheet: ALS_lists.all_proteins
GeneName	ALSGene (n = 17)	ALSoD (n = 111)	GAD (n = 224)	Genotator (n = 289)	HuGE GWAS (n = 118)	HuGE GeneProspector (n = 224)	Text Mining (n = 164)	Overlap	Network support	UniProtID	Protein Description
ACTR5				X		X		2		ARP5_HUMAN	Actin-related protein 5
ADAM10					X			1	Tier 2	ADA10_HUMAN	Disintegrin and metalloproteinase domain-containing protein 10
ADAMTS14			X					1		ATS14_HUMAN	A disintegrin and metalloproteinase with thrombospondin motifs 14
ADAMTS16			X					1		ATS16_HUMAN	A disintegrin and metalloproteinase with thrombospondin motifs 16
ADAR							X	1		DSRAD_HUMAN	Double-stranded RNA-specific adenosine deaminase
ADARB1							X	1		RED1_HUMAN	Double-stranded RNA-specific editase 1
ADARB2							X	1		RED2_HUMAN	Double-stranded RNA-specific editase B2
ADD1			X	X		X		3	Tier 2	ADDA_HUMAN	Alpha-adducin
ADRB2			X	X		X		3	Tier 2	ADRB2_HUMAN	Beta-2 adrenergic receptor
ADRB3			X	X		X		3		ADRB3_HUMAN	Beta-3 adrenergic receptor
AFF1					X			1		AFF1_HUMAN	AF4/FMR2 family member 1
AGBL4			X					1		CBPC6_HUMAN	Cytosolic carboxypeptidase 6
AGT		X	X	X		X		4		ANGT_HUMAN	Angiotensinogen
AGTR1			X	X		X		3		AGTR1_HUMAN	Type-1 angiotensin II receptor
AIF1							X	1		AIF1_HUMAN	Allograft inflammatory factor 1
AKAP13			X					1		AKP13_HUMAN	A-kinase anchor protein 13
ALAD		X	X	X		X		4		HEM2_HUMAN	Delta-aminolevulinic acid dehydratase
ALS2		X	X	X		X	X	5		ALS2_HUMAN	Alsin
ALS2CL				X			X	2		AL2CL_HUMAN	ALS2 C-terminal-like protein
ALS2CR11				X				1		AL2SA_HUMAN	Amyotrophic lateral sclerosis 2 chromosomal region candidate gene 11 protein
ALS2CR12				X				1		AL2SB_HUMAN	Amyotrophic lateral sclerosis 2 chromosomal region candidate gene 12 protein
ALS2CR8				X				1		CARTF_HUMAN	Calcium-responsive transcription factor
ALS6,FUS		X	X	X		X	X	5	Tier 1	FUS_HUMAN	RNA-binding protein FUS
ANG		X	X	X		X	X	5		ANGI_HUMAN	Angiogenin
ANGPTL4				X		X		2		ANGL4_HUMAN	Angiopoietin-related protein 4
ANK1			X	X		X		3		ANK1_HUMAN	Ankyrin-1
ANKRD2				X				1		ANKR2_HUMAN	Ankyrin repeat domain-containing protein 2
ANKS1B					X			1		ANS1B_HUMAN	Ankyrin repeat and sterile alpha motif domain-containing protein 1B
ANXA6				X			X	2		ANXA6_HUMAN	Annexin A6
AOX1				X				1		ADO_HUMAN	Aldehyde oxidase
APAF1				X				1	Tier 2	APAF_HUMAN	Apoptotic protease-activating factor 1
APEX1		X		X		X		3		APEX1_HUMAN	DNA-(apurinic or apyrimidinic site) lyase
APOA4			X	X		X		3	Tier 1	APOA4_HUMAN	Apolipoprotein A-IV
APOB			X	X		X		3	Tier 1	APOB_HUMAN	Apolipoprotein B-100
APOC3			X	X		X		3	Tier 1	APOC3_HUMAN	Apolipoprotein C-III
APOE		X	X	X		X		4	Tier 1	APOE_HUMAN	Apolipoprotein E
APP				X			X	2	Tier 2	A4_HUMAN	Amyloid beta A4 protein
AR		X		X		X	X	4		ANDR_HUMAN	Androgen receptor
ARAP2					X			1		ARAP2_HUMAN	Arf-GAP with Rho-GAP domain, ANK repeat and PH domain-containing protein 2
ARFIP1					X			1		ARFP1_HUMAN	Arfaptin-1
ARHGAP18			X	X		X		3		RHG18_HUMAN	Rho GTPase-activating protein 18
ARHGEF2				X	X			2		ARHG2_HUMAN	Rho guanine nucleotide exchange factor 2
ARHGEF28,RGNEF		X				X		2	Tier 1	ARG28_HUMAN	Rho guanine nucleotide exchange factor 28
ARSG			X					1		ARSG_HUMAN	Arylsulfatase G
ATF3							X	1		ATF3_HUMAN	Cyclic AMP-dependent transcription factor ATF-3
ATP6AP1L			X					1		VAS1L_HUMAN	V-type proton ATPase subunit S1-like protein
ATPBD4			X					1		DPH6_HUMAN	Diphthine--ammonia ligase
ATXN1			X		X	X		3		ATX1_HUMAN	Ataxin-1
ATXN2		X		X		X	X	4	Tier 1	ATX2_HUMAN	Ataxin-2
ATXN3							X	1	Tier 2	ATX3_HUMAN	Ataxin-3
B3GNT3					X			1		B3GN3_HUMAN	N-acetyllactosaminide beta-1,3-N-acetylglucosaminyltransferase 3
B4GALT6		X	X		X			3		B4GT6_HUMAN	Beta-1,4-galactosyltransferase 6
BCAS1			X					1		BCAS1_HUMAN	Breast carcinoma-amplified sequence 1
BCL11B		X						1	Tier 2	BC11B_HUMAN	B-cell lymphoma/leukemia 11B
BCL2							X	1	Tier 1	BCL2_HUMAN	Apoptosis regulator Bcl-2
BCL6		X						1		BCL6_HUMAN	B-cell lymphoma 6 protein
BDNF				X			X	2	Tier 2	BDNF_HUMAN	Brain-derived neurotrophic factor
BMP8A					X			1		BMP8A_HUMAN	Bone morphogenetic protein 8A
BMP8B					X			1		BMP8B_HUMAN	Bone morphogenetic protein 8B
BPTF				X				1		BPTF_HUMAN	Nucleosome-remodeling factor subunit BPTF
BSCL2							X	1		BSCL2_HUMAN	Seipin
BTBD10							X	1		BTBDA_HUMAN	BTB/POZ domain-containing protein 10
BTBD11			X					1		BTBDB_HUMAN	Ankyrin repeat and BTB/POZ domain-containing protein BTBD11
BUB3	X							1		BUB3_HUMAN	Mitotic checkpoint protein BUB3
C11ORF40					X			1		CK040_HUMAN	Putative uncharacterized protein C11orf40
C13ORF18			X	X		X		3		K226L_HUMAN	Uncharacterized protein KIAA0226-like
C1ORF112					X			1		CA112_HUMAN	Uncharacterized protein C1orf112
C1ORF27		X						1		ODR4_HUMAN	Protein odr-4 homolog
C21ORF34					X			1		CU034_HUMAN	-
C22ORF13			X					1		GUCD1_HUMAN	Protein GUCD1
C2CD4A			X					1		C2C4A_HUMAN	C2 calcium-dependent domain-containing protein 4A
C4ORF36			X		X			2		CD036_HUMAN	Uncharacterized protein C4orf36
C5ORF22			X					1		CE022_HUMAN	UPF0489 protein C5orf22
C5ORF38			X					1		CEI_HUMAN	Protein CEI
C7ORF57			X	X		X		3		CG057_HUMAN	Uncharacterized protein C7orf57
C9ORF116				X				1		CI116_HUMAN	UPF0691 protein C9orf116
C9ORF72	X	X	X	X	X	X	X	7		CI072_HUMAN	Protein C9orf72
CABIN1						X		1		CABIN_HUMAN	Calcineurin-binding protein cabin-1
CAMK1G						X		1		KCC1G_HUMAN	Calcium/calmodulin-dependent protein kinase type 1G
CAPN3				X				1		CAN3_HUMAN	Calpain-3
CASP1							X	1	Tier 2	CASP1_HUMAN	Caspase-1
CASP3							X	1	Tier 1	CASP3_HUMAN	Caspase-3
CAV1				X		X		2	Tier 2	CAV1_HUMAN	Caveolin-1
CCL2				X				1		CCL2_HUMAN	C-C motif chemokine 2
CCS		X		X			X	3	Tier 1	CCS_HUMAN	Copper chaperone for superoxide dismutase
CD1E			X					1		CD1E_HUMAN	T-cell surface glycoprotein CD1e, membrane-associated
CD28				X				1		CD28_HUMAN	T-cell-specific surface glycoprotein CD28
CD68							X	1		CD68_HUMAN	Macrosialin
CDC42			X					1		CDC42_HUMAN	Cell division control protein 42 homolog
CDC5L			X					1		CDC5L_HUMAN	Cell division cycle 5-like protein
CDCA7			X					1		CDCA7_HUMAN	Cell division cycle-associated protein 7
CDH10			X					1	Tier 2	CAD10_HUMAN	Cadherin-10
CDH13		X						1	Tier 2	CAD13_HUMAN	Cadherin-13
CDH22		X						1		CAD22_HUMAN	Cadherin-22
CDK5				X			X	2	Tier 2	CDK5_HUMAN	Cyclin-dependent-like kinase 5
CENPV					X			1		CENPV_HUMAN	Centromere protein V
CETP			X	X		X		3	Tier 1	CETP_HUMAN	Cholesteryl ester transfer protein
CHAT				X			X	2		CLAT_HUMAN	Choline O-acetyltransferase
CHGB			X	X		X		3	Tier 1	SCG1_HUMAN	Secretogranin-1
CHKB				X				1		CHKB_HUMAN	Choline/ethanolamine kinase
CHMP2B		X	X	X		X	X	5		CHM2B_HUMAN	Charged multivesicular body protein 2b
CHRNA3				X		X		2	Tier 2	ACHA3_HUMAN	Neuronal acetylcholine receptor subunit alpha-3
CHRNA4				X		X		2	Tier 2	ACHA4_HUMAN	Neuronal acetylcholine receptor subunit alpha-4
CHRNB4				X		X	X	3	Tier 2	ACHB4_HUMAN	Neuronal acetylcholine receptor subunit beta-4
CLU				X		X		2	Tier 2	CLUS_HUMAN	Clusterin
CNDP1			X					1		CNDP1_HUMAN	Beta-Ala-His dipeptidase
CNOT2					X			1		CNOT2_HUMAN	CCR4-NOT transcription complex subunit 2
CNTF		X		X			X	3	Tier 1	CNTF_HUMAN	Ciliary neurotrophic factor
CNTFR				X				1	Tier 2	CNTFR_HUMAN	Ciliary neurotrophic factor receptor subunit alpha
CNTN4		X	X		X	X		4	Tier 2	CNTN4_HUMAN	Contactin-4
CNTN6		X						1		CNTN6_HUMAN	Contactin-6
COMMD10			X		X			2		COMDA_HUMAN	COMM domain-containing protein 10
CP				X		X		2		CERU_HUMAN	Ceruloplasmin
CPNE4					X			1		CPNE4_HUMAN	Copine-4
CPZ	X							1		CBPZ_HUMAN	Carboxypeptidase Z
CR1				X		X		2		CR1_HUMAN	Complement receptor type 1
CREBBP				X			X	2		CBP_HUMAN	CREB-binding protein
CRIM1		X						1		CRIM1_HUMAN	Cysteine-rich motor neuron 1 protein
CRYAB				X				1	Tier 2	CRYAB_HUMAN	Alpha-crystallin B chain
CRYM		X						1		CRYM_HUMAN	Ketimine reductase mu-crystallin
CSNK1G3		X	X		X			3	Tier 2	KC1G3_HUMAN	Casein kinase I isoform gamma-3
CST3		X	X	X		X	X	5	Tier 2	CYTC_HUMAN	Cystatin-C
CST7							X	1		CYTF_HUMAN	Cystatin-F
CTDP1					X			1		CTDP1_HUMAN	RNA polymerase II subunit A C-terminal domain phosphatase
CTRL							X	1		CTRL_HUMAN	Chymotrypsin-like protease CTRL-1
CUBN			X					1		CUBN_HUMAN	Cubilin
CXORF27			X					1	Tier 2	HYPM_HUMAN	Huntingtin-interacting protein M
CYBB							X	1		CY24B_HUMAN	Cytochrome b-245 heavy chain
CYCS							X	1	Tier 2	CYC_HUMAN	Cytochrome c
CYFIP2							X	1		CYFP2_HUMAN	Cytoplasmic FMR1-interacting protein 2
CYP1A1			X	X		X		3		CP1A1_HUMAN	Cytochrome P450 1A1
CYP1A2			X	X		X		3		CP1A2_HUMAN	Cytochrome P450 1A2
CYP27A1				X		X		2		CP27A_HUMAN	Sterol 26-hydroxylase, mitochondrial
CYP2C19				X				1		CP2CJ_HUMAN	Cytochrome P450 2C19
CYP2C9				X				1		CP2C9_HUMAN	Cytochrome P450 2C9
CYP2D6		X		X				2		CP2D6_HUMAN	Cytochrome P450 2D6
CYP3A4				X				1		CP3A4_HUMAN	Cytochrome P450 3A4
CYP4F2				X				1		CP4F2_HUMAN	Phylloquinone omega-hydroxylase CYP4F2
DAO		X		X			X	3		OXDA_HUMAN	D-amino-acid oxidase
DBNL							X	1		DBNL_HUMAN	Drebrin-like protein
DCP1A			X	X		X		3		DCP1A_HUMAN	mRNA-decapping enzyme 1A
DCTN1		X	X	X		X	X	5	Tier 1	DCTN1_HUMAN	Dynactin subunit 1
DEFB112			X					1		DB112_HUMAN	Beta-defensin 112
DERL1							X	1	Tier 1	DERL1_HUMAN	Derlin-1
DHFR				X		X		2		DYR_HUMAN	Dihydrofolate reductase
DHX57					X			1		DHX57_HUMAN	Putative ATP-dependent RNA helicase DHX57
DIAPH3		X						1		DIAP3_HUMAN	Protein diaphanous homolog 3
DISC1	X	X	X		X			4		DISC1_HUMAN	Disrupted in schizophrenia 1 protein
DLEU7			X					1		LEU7_HUMAN	Leukemia-associated protein 7
DLGAP1			X					1	Tier 2	DLGP1_HUMAN	Disks large-associated protein 1
DMD			X					1	Tier 2	DMD_HUMAN	Dystrophin
DNAJB1							X	1	Tier 2	DNJB1_HUMAN	DnaJ homolog subfamily B member 1
DOC2B		X						1		DOC2B_HUMAN	Double C2-like domain-containing protein beta
DOCK1					X			1		DOCK1_HUMAN	Dedicator of cytokinesis protein 1
DPP6		X	X	X	X	X	X	6		DPP6_HUMAN	Dipeptidyl aminopeptidase-like protein 6
DPYD						X		1		DPYD_HUMAN	Dihydropyrimidine dehydrogenase [NADP(+)]
DPYSL3						X		1		DPYL3_HUMAN	Dihydropyrimidinase-related protein 3
DSG2					X			1	Tier 2	DSG2_HUMAN	Desmoglein-2
DUSP19				X				1		DUS19_HUMAN	Dual specificity protein phosphatase 19
DYNC1H1		X	X	X		X	X	5		DYHC1_HUMAN	Cytoplasmic dynein 1 heavy chain 1
EFEMP1		X	X		X			3	Tier 2	FBLN3_HUMAN	EGF-containing fibulin-like extracellular matrix protein 1
EIF2AK3						X		1		E2AK3_HUMAN	Eukaryotic translation initiation factor 2-alpha kinase 3
ELAVL2			X					1		ELAV2_HUMAN	ELAV-like protein 2
ELF5			X					1		ELF5_HUMAN	ETS-related transcription factor Elf-5
ELP3		X	X	X		X	X	5		ELP3_HUMAN	Elongator complex protein 3
ENPP1	X							1		ENPP1_HUMAN	Ectonucleotide pyrophosphatase/phosphodiesterase family member 1
EOMES			X					1		EOMES_HUMAN	Eomesodermin homolog
EPB41L3			X					1	Tier 2	E41L3_HUMAN	Band 4.1-like protein 3
EPG5							X	1		EPG5_HUMAN	Ectopic P granules protein 5 homolog
EPHA3						X		1	Tier 2	EPHA3_HUMAN	Ephrin type-A receptor 3
EPHA4		X						1	Tier 2	EPHA4_HUMAN	Ephrin type-A receptor 4
EPO			X	X		X		3		EPO_HUMAN	Erythropoietin
ERBB4		X						1		ERBB4_HUMAN	Receptor tyrosine-protein kinase erbB-4
EWSR1		X		X		X	X	4		EWS_HUMAN	RNA-binding protein EWS
EXO1	X							1		EXO1_HUMAN	Exonuclease 1
EXOC4			X	X		X		3	Tier 2	EXOC4_HUMAN	Exocyst complex component 4
F2			X	X		X		3	Tier 2	THRB_HUMAN	Prothrombin
F5			X	X		X		3		FA5_HUMAN	Coagulation factor V
F7			X	X		X		3		FA7_HUMAN	Coagulation factor VII
FAM117B				X				1		F117B_HUMAN	Protein FAM117B
FAM129C					X			1		NIBL2_HUMAN	Niban-like protein 2
FAM196A			X					1		F196A_HUMAN	Protein FAM196A
FAM19A5			X					1		F19A5_HUMAN	Protein FAM19A5
FAM9B			X					1		FAM9B_HUMAN	Protein FAM9B
FANCD2				X				1		FACD2_HUMAN	Fanconi anemia group D2 protein
FBXO8			X	X		X		3		FBX8_HUMAN	F-box only protein 8
FCHO1					X			1		FCHO1_HUMAN	F-BAR domain only protein 1
FEZF2		X						1		FEZF2_HUMAN	Fez family zinc finger protein 2
FGB			X	X		X		3		FIBB_HUMAN	Fibrinogen beta chain
FGGY		X	X	X		X	X	5		FGGY_HUMAN	FGGY carbohydrate kinase domain-containing protein
FHDC1,KIAA1727			X		X			2		FHDC1_HUMAN	FH2 domain-containing protein 1
FIG4		X		X		X	X	4		FIG4_HUMAN	Polyphosphoinositide phosphatase
FMN2			X					1		FMN2_HUMAN	Formin-2
FMO1			X	X		X		3		FMO1_HUMAN	Dimethylaniline monooxygenase [N-oxide-forming] 1
FMR1				X		X		2		FMR1_HUMAN	Synaptic functional regulator FMR1
FOLH1				X			X	2		FOLH1_HUMAN	Glutamate carboxypeptidase 2
FOLH1B					X		X	2		FOH1B_HUMAN	Putative N-acetylated-alpha-linked acidic dipeptidase
FOXF2			X					1		FOXF2_HUMAN	Forkhead box protein F2
FXN				X		X	X	3		FRDA_HUMAN	Frataxin, mitochondrial
GALM					X			1		GALM_HUMAN	Aldose 1-epimerase
GALNT1			X	X		X		3		GALT1_HUMAN	Polypeptide N-acetylgalactosaminyltransferase 1
GAN							X	1		GAN_HUMAN	Gigaxonin
GAP43				X			X	2		NEUM_HUMAN	Neuromodulin
GARS		X					X	2		SYG_HUMAN	Glycine--tRNA ligase
GART				X			X	2		PUR2_HUMAN	Trifunctional purine biosynthetic protein adenosine-3
GDA				X				1		GUAD_HUMAN	Guanine deaminase
GDNF				X			X	2		GDNF_HUMAN	Glial cell line-derived neurotrophic factor
GEMIN6					X			1		GEMI6_HUMAN	Gem-associated protein 6
GFAP				X			X	2	Tier 2	GFAP_HUMAN	Glial fibrillary acidic protein
GFRA1				X				1		GFRA1_HUMAN	GDNF family receptor alpha-1
GLG1				X			X	2		GSLG1_HUMAN	Golgi apparatus protein 1
GLS				X				1		GLSK_HUMAN	Glutaminase kidney isoform, mitochondrial
GLT25D1					X			1		GT251_HUMAN	Procollagen galactosyltransferase 1
GLUL				X				1		GLNA_HUMAN	Glutamine synthetase
GNAL			X					1		GNAL_HUMAN	Guanine nucleotide-binding protein G(olf) subunit alpha
GNB3			X	X		X		3		GBB3_HUMAN	Guanine nucleotide-binding protein G(I)/G(S)/G(T) subunit beta-3
GPR162				X				1		GP162_HUMAN	Probable G-protein coupled receptor 162
GRB14		X						1		GRB14_HUMAN	Growth factor receptor-bound protein 14
GRIA1				X			X	2	Tier 2	GRIA1_HUMAN	Glutamate receptor 1
GRIA2				X		X	X	3	Tier 2	GRIA2_HUMAN	Glutamate receptor 2
GRIA3							X	1	Tier 2	GRIA3_HUMAN	Glutamate receptor 3
GRIA4				X			X	2	Tier 2	GRIA4_HUMAN	Glutamate receptor 4
GRIK1				X				1	Tier 2	GRIK1_HUMAN	Glutamate receptor ionotropic, kainate 1
GRIK2			X			X		2	Tier 2	GRIK2_HUMAN	Glutamate receptor ionotropic, kainate 2
GRIN2A			X	X				2	Tier 2	NMDE1_HUMAN	Glutamate receptor ionotropic, NMDA 2A
GRIN2B			X					1	Tier 2	NMDE2_HUMAN	Glutamate receptor ionotropic, NMDA 2B
GRM1							X	1	Tier 2	GRM1_HUMAN	Metabotropic glutamate receptor 1
GRM5				X			X	2	Tier 2	GRM5_HUMAN	Metabotropic glutamate receptor 5
GRN		X		X		X	X	4	Tier 2	GRN_HUMAN	Granulins
GSK3B							X	1		GSK3B_HUMAN	Glycogen synthase kinase-3 beta
GSR				X				1		GSHR_HUMAN	Glutathione reductase, mitochondrial
GSS			X	X		X		3		GSHB_HUMAN	Glutathione synthetase
GSTO1			X	X		X		3		GSTO1_HUMAN	Glutathione S-transferase omega-1
GSTO2			X	X		X		3		GSTO2_HUMAN	Glutathione S-transferase omega-2
HAAO			X					1		3HAO_HUMAN	3-hydroxyanthranilate 3,4-dioxygenase
HDAC1				X				1		HDAC1_HUMAN	Histone deacetylase 1
HDAC6							X	1	Tier 1	HDAC6_HUMAN	Histone deacetylase 6
HECW1							X	1	Tier 1	HECW1_HUMAN	E3 ubiquitin-protein ligase HECW1
HEXA		X		X			X	3		HEXA_HUMAN	Beta-hexosaminidase subunit alpha
HEYL					X			1		HEYL_HUMAN	Hairy/enhancer-of-split related with YRPW motif-like protein
HFE		X	X	X		X	X	5		HFE_HUMAN	Hereditary hemochromatosis protein
HGF				X		X	X	3		HGF_HUMAN	Hepatocyte growth factor
HLA-B						X		1		1B07_HUMAN	HLA class I histocompatibility antigen, B-7 alpha chain
HLA-B						X		1		1B08_HUMAN	HLA class I histocompatibility antigen, B-8 alpha chain
HLA-B						X		1		1B13_HUMAN	HLA class I histocompatibility antigen, B-13 alpha chain
HLA-B						X		1		1B14_HUMAN	HLA class I histocompatibility antigen, B-14 alpha chain
HLA-B						X		1		1B15_HUMAN	HLA class I histocompatibility antigen, B-15 alpha chain
HLA-B						X		1		1B18_HUMAN	HLA class I histocompatibility antigen, B-18 alpha chain
HLA-B						X		1		1B27_HUMAN	HLA class I histocompatibility antigen, B-27 alpha chain
HLA-B						X		1		1B35_HUMAN	HLA class I histocompatibility antigen, B-35 alpha chain
HLA-B						X		1		1B37_HUMAN	HLA class I histocompatibility antigen, B-37 alpha chain
HLA-B						X		1		1B38_HUMAN	HLA class I histocompatibility antigen, B-38 alpha chain
HLA-B						X		1		1B39_HUMAN	HLA class I histocompatibility antigen, B-39 alpha chain
HLA-B						X		1		1B40_HUMAN	HLA class I histocompatibility antigen, B-40 alpha chain
HLA-B						X		1		1B41_HUMAN	HLA class I histocompatibility antigen, B-41 alpha chain
HLA-B						X		1		1B42_HUMAN	HLA class I histocompatibility antigen, B-42 alpha chain
HLA-B						X		1		1B44_HUMAN	HLA class I histocompatibility antigen, B-44 alpha chain
HLA-B						X		1		1B45_HUMAN	HLA class I histocompatibility antigen, B-45 alpha chain
HLA-B						X		1		1B46_HUMAN	HLA class I histocompatibility antigen, B-46 alpha chain
HLA-B						X		1		1B47_HUMAN	HLA class I histocompatibility antigen, B-47 alpha chain
HLA-B						X		1		1B48_HUMAN	HLA class I histocompatibility antigen, B-48 alpha chain
HLA-B						X		1		1B49_HUMAN	HLA class I histocompatibility antigen, B-49 alpha chain
HLA-B						X		1		1B50_HUMAN	HLA class I histocompatibility antigen, B-50 alpha chain
HLA-B						X		1		1B51_HUMAN	HLA class I histocompatibility antigen, B-51 alpha chain
HLA-B						X		1		1B52_HUMAN	HLA class I histocompatibility antigen, B-52 alpha chain
HLA-B						X		1		1B53_HUMAN	HLA class I histocompatibility antigen, B-53 alpha chain
HLA-B						X		1		1B54_HUMAN	HLA class I histocompatibility antigen, B-54 alpha chain
HLA-B						X		1		1B55_HUMAN	HLA class I histocompatibility antigen, B-55 alpha chain
HLA-B						X		1		1B56_HUMAN	HLA class I histocompatibility antigen, B-56 alpha chain
HLA-B						X		1		1B57_HUMAN	HLA class I histocompatibility antigen, B-57 alpha chain
HLA-B						X		1		1B58_HUMAN	HLA class I histocompatibility antigen, B-58 alpha chain
HLA-B						X		1		1B59_HUMAN	HLA class I histocompatibility antigen, B-59 alpha chain
HLA-B						X		1		1B67_HUMAN	HLA class I histocompatibility antigen, B-67 alpha chain
HLA-B						X		1		1B73_HUMAN	HLA class I histocompatibility antigen, B-73 alpha chain
HLA-B						X		1		1B78_HUMAN	HLA class I histocompatibility antigen, B-78 alpha chain
HLA-B						X		1		1B81_HUMAN	HLA class I histocompatibility antigen, B-81 alpha chain
HLA-B						X		1		1B82_HUMAN	HLA class I histocompatibility antigen, B-82 alpha chain
HMOX1							X	1		HMOX1_HUMAN	Heme oxygenase 1
HNRNPA1		X				X	X	3	Tier 1	ROA1_HUMAN	Heterogeneous nuclear ribonucleoprotein A1
HNRNPA2B1		X				X		2	Tier 2	ROA2_HUMAN	Heterogeneous nuclear ribonucleoproteins A2/B1
HNRNPA3						X		1		ROA3_HUMAN	Heterogeneous nuclear ribonucleoprotein A3
HPCAL4					X			1		HPCL4_HUMAN	Hippocalcin-like protein 4
HPGD			X	X		X		3		PGDH_HUMAN	15-hydroxyprostaglandin dehydrogenase [NAD(+)]
HRK				X				1		HRK_HUMAN	Activator of apoptosis harakiri
HS3ST3A1			X					1	Tier 1	HS3SA_HUMAN	Heparan sulfate glucosamine 3-O-sulfotransferase 3A1
HSF1				X			X	2		HSF1_HUMAN	Heat shock factor protein 1
HSPA8							X	1		HSP7C_HUMAN	Heat shock cognate 71 kDa protein
HSPB1				X			X	2	Tier 2	HSPB1_HUMAN	Heat shock protein beta-1
HSPB2				X				1	Tier 2	HSPB2_HUMAN	Heat shock protein beta-2
HSPB3							X	1	Tier 2	HSPB3_HUMAN	Heat shock protein beta-3
HSPB8							X	1	Tier 2	HSPB8_HUMAN	Heat shock protein beta-8
HTT				X		X	X	3	Tier 2	HD_HUMAN	Huntingtin
HUS1			X	X		X		3		HUS1_HUMAN	Checkpoint protein HUS1
ICA1L				X				1		ICA1L_HUMAN	Islet cell autoantigen 1-like protein
ICAM1			X	X		X		3		ICAM1_HUMAN	Intercellular adhesion molecule 1
IDDM10				X				1		IL2RA_HUMAN	Interleukin-2 receptor subunit alpha
IFNK			X		X	X		3		IFNK_HUMAN	Interferon kappa
IFRD1					X			1		IFRD1_HUMAN	Interferon-related developmental regulator 1
IGF1				X			X	2	Tier 2	IGF1_HUMAN	Insulin-like growth factor I
IGFALS				X			X	2	Tier 2	ALS_HUMAN	Insulin-like growth factor-binding protein complex acid labile subunit
IGFBP2				X				1	Tier 2	IBP2_HUMAN	Insulin-like growth factor-binding protein 2
IGFBP5				X				1	Tier 2	IBP5_HUMAN	Insulin-like growth factor-binding protein 5
IL18BP				X		X		2		I18BP_HUMAN	Interleukin-18-binding protein
IL1RAPL2			X					1		IRPL2_HUMAN	X-linked interleukin-1 receptor accessory protein-like 2
INA							X	1		AINX_HUMAN	Alpha-internexin
INHBA				X		X		2		INHBA_HUMAN	Inhibin beta A chain
INSL3					X			1		INSL3_HUMAN	Insulin-like 3
INTS4			X					1		INT4_HUMAN	Integrator complex subunit 4
ISG15				X				1		ISG15_HUMAN	Ubiquitin-like protein ISG15
ITGA2			X	X		X		3		ITA2_HUMAN	Integrin alpha-2
ITGB3			X	X		X		3		ITB3_HUMAN	Integrin beta-3
ITPR2		X	X	X	X	X	X	6		ITPR2_HUMAN	Inositol 1,4,5-trisphosphate receptor type 2
JAK3					X			1		JAK3_HUMAN	Tyrosine-protein kinase JAK3
JRKL			X					1		JERKL_HUMAN	Jerky protein homolog-like
KCNG2					X			1		KCNG2_HUMAN	Potassium voltage-gated channel subfamily G member 2
KCNIP4			X					1	Tier 2	KCIP4_HUMAN	Kv channel-interacting protein 4
KCNMA1			X					1	Tier 2	KCMA1_HUMAN	Calcium-activated potassium channel subunit alpha-1
KCNN3				X				1	Tier 2	KCNN3_HUMAN	Small conductance calcium-activated potassium channel protein 3
KCNS3			X		X			2		KCNS3_HUMAN	Potassium voltage-gated channel subfamily S member 3
KDM4A					X			1		KDM4A_HUMAN	Lysine-specific demethylase 4A
KDR		X						1		VGFR2_HUMAN	Vascular endothelial growth factor receptor 2
KEAP1							X	1		KEAP1_HUMAN	Kelch-like ECH-associated protein 1
KIAA0513					X			1		K0513_HUMAN	Uncharacterized protein KIAA0513
KIAA0586			X					1		TALD3_HUMAN	Protein TALPID3
KIAA1012					X			1		TPPC8_HUMAN	Trafficking protein particle complex subunit 8
KIF5A							X	1		KIF5A_HUMAN	Kinesin heavy chain isoform 5A
KIFAP3		X	X	X	X	X	X	6		KIFA3_HUMAN	Kinesin-associated protein 3
KLF3			X					1		KLF3_HUMAN	Krueppel-like factor 3
LAMA2			X					1		LAMA2_HUMAN	Laminin subunit alpha-2
LAMA3	X				X			2		LAMA3_HUMAN	Laminin subunit alpha-3
LCN1L1			X					1		LC1L1_HUMAN	Putative lipocalin 1-like protein 1
LDLR			X	X		X		3	Tier 1	LDLR_HUMAN	Low-density lipoprotein receptor
LEP				X		X		2		LEP_HUMAN	Leptin
LGALS1				X				1		LEG1_HUMAN	Galectin-1
LHFP	X							1		LHFP_HUMAN	Lipoma HMGIC fusion partner
LIAS				X				1		LIAS_HUMAN	Lipoyl synthase, mitochondrial
LIF		X						1		LIF_HUMAN	Leukemia inhibitory factor
LIPC		X	X	X	X	X		5	Tier 1	LIPC_HUMAN	Hepatic triacylglycerol lipase
LMNB1		X		X				2		LMNB1_HUMAN	Lamin-B1
LOX		X	X	X		X		4		LYOX_HUMAN	Protein-lysine 6-oxidase
LPA			X	X		X		3	Tier 1	APOA_HUMAN	Apolipoprotein(a)
LPL			X	X		X		3	Tier 1	LIPL_HUMAN	Lipoprotein lipase
LRRC4			X					1		LRRC4_HUMAN	Leucine-rich repeat-containing protein 4
LRRK2						X	X	2	Tier 2	LRRK2_HUMAN	Leucine-rich repeat serine/threonine-protein kinase 2
LRRTM1			X					1		LRRT1_HUMAN	Leucine-rich repeat transmembrane neuronal protein 1
LTA			X	X		X		3		TNFB_HUMAN	Lymphotoxin-alpha
LUM		X						1		LUM_HUMAN	Lumican
LY6E							X	1		LY6E_HUMAN	Lymphocyte antigen 6E
M6PR				X				1	Tier 2	MPRD_HUMAN	Cation-dependent mannose-6-phosphate receptor
MACF1					X			1		MACF1_HUMAN	Microtubule-actin cross-linking factor 1, isoforms 1/2/3/5
MACROD2			X	X		X		3		MACD2_HUMAN	O-acetyl-ADP-ribose deacetylase MACROD2
MAG				X				1	Tier 2	MAG_HUMAN	Myelin-associated glycoprotein
MAL2				X				1		MAL2_HUMAN	Protein MAL2
MAN1A2			X	X		X		3		MA1A2_HUMAN	Mannosyl-oligosaccharide 1,2-alpha-mannosidase IB
MAOB		X		X			X	3		AOFB_HUMAN	Amine oxidase [flavin-containing] B
MAP1S					X			1		MAP1S_HUMAN	Microtubule-associated protein 1S
MAP2K5				X		X		2		MP2K5_HUMAN	Dual specificity mitogen-activated protein kinase kinase 5
MAP3K5							X	1	Tier 2	M3K5_HUMAN	Mitogen-activated protein kinase kinase kinase 5
MAP3K8			X					1		M3K8_HUMAN	Mitogen-activated protein kinase kinase kinase 8
MAP4K3						X		1		M4K3_HUMAN	Mitogen-activated protein kinase kinase kinase kinase 3
MAPT		X		X		X	X	4	Tier 1	TAU_HUMAN	Microtubule-associated protein tau
MATR3		X						1		MATR3_HUMAN	Matrin-3
MCART2					X			1		S2552_HUMAN	Solute carrier family 25 member 52
MECOM			X					1		EVI1_HUMAN	MDS1 and EVI1 complex locus protein EVI1
MECOM			X					1		MDS1_HUMAN	MDS1 and EVI1 complex locus protein MDS1
METTL11B					X			1		NTM1B_HUMAN	Alpha N-terminal protein methyltransferase 1B
MIF				X		X		2		MIF_HUMAN	Macrophage migration inhibitory factor
MIST			X			X		2		CLNK_HUMAN	Cytokine-dependent hematopoietic cell linker
MMP1				X		X		2	Tier 2	MMP1_HUMAN	Interstitial collagenase
MMP12				X		X		2		MMP12_HUMAN	Macrophage metalloelastase
MMP3			X	X		X		3		MMP3_HUMAN	Stromelysin-1
MMP9			X	X		X		3		MMP9_HUMAN	Matrix metalloproteinase-9
MOB3B,MOBKL2B			X		X	X	X	4		MOB3B_HUMAN	MOB kinase activator 3B
MORN2			X		X			2		MORN2_HUMAN	MORN repeat-containing protein 2
MPP4				X				1		MPP4_HUMAN	MAGUK p55 subfamily member 4
MPZL1			X					1		MPZL1_HUMAN	Myelin protein zero-like protein 1
MSX2			X					1		MSX2_HUMAN	Homeobox protein MSX-2
MT-ND2		X						1		NU2M_HUMAN	NADH-ubiquinone oxidoreductase chain 2
MT2A			X	X		X		3	Tier 2	MT2_HUMAN	Metallothionein-2
MT3			X	X		X	X	4		MT3_HUMAN	Metallothionein-3
MTF1			X	X		X		3		MTF1_HUMAN	Metal regulatory transcription factor 1
MTHFR			X	X		X		3		MTHR_HUMAN	Methylenetetrahydrofolate reductase
MYL6				X				1		MYL6_HUMAN	Myosin light polypeptide 6
MYLIP			X					1	Tier 1	MYLIP_HUMAN	E3 ubiquitin-protein ligase MYLIP
NAIP		X		X			X	3		BIRC1_HUMAN	Baculoviral IAP repeat-containing protein 1
NBEAL1				X				1		NBEL1_HUMAN	Neurobeachin-like protein 1
NCAM2			X					1		NCAM2_HUMAN	Neural cell adhesion molecule 2
ND5,MT-ND5			X	X		X		3		NU5M_HUMAN	NADH-ubiquinone oxidoreductase chain 5
NEFH		X		X		X	X	4	Tier 2	NFH_HUMAN	Neurofilament heavy polypeptide
NEFL				X			X	2	Tier 2	NFL_HUMAN	Neurofilament light polypeptide
NEFM							X	1	Tier 1	NFM_HUMAN	Neurofilament medium polypeptide
NELL1			X	X		X		3		NELL1_HUMAN	Protein kinase C-binding protein NELL1
NES							X	1		NEST_HUMAN	Nestin
NETO1		X						1	Tier 2	NETO1_HUMAN	Neuropilin and tolloid-like protein 1
NFE2L2						X	X	2		NF2L2_HUMAN	Nuclear factor erythroid 2-related factor 2
NGF				X				1	Tier 2	NGF_HUMAN	Beta-nerve growth factor
NGFR				X				1	Tier 2	TNR16_HUMAN	Tumor necrosis factor receptor superfamily member 16
NIF3L1				X				1		GTPC1_HUMAN	NIF3-like protein 1
NIPA1				X		X	X	3		NIPA1_HUMAN	Magnesium transporter NIPA1
NKRF			X					1		NKRF_HUMAN	NF-kappa-B-repressing factor
NLGN1			X	X		X		3		NLGN1_HUMAN	Neuroligin-1
NLRP4	X							1		NALP4_HUMAN	NACHT, LRR and PYD domains-containing protein 4
NOP56				X		X	X	3		NOP56_HUMAN	Nucleolar protein 56
NOS1				X			X	2	Tier 2	NOS1_HUMAN	Nitric oxide synthase, brain
NOS2							X	1	Tier 2	NOS2_HUMAN	Nitric oxide synthase, inducible
NOS3			X	X		X		3	Tier 2	NOS3_HUMAN	Nitric oxide synthase, endothelial
NOX4					X			1		NOX4_HUMAN	NADPH oxidase 4
NPBWR1			X					1	Tier 2	NPBW1_HUMAN	Neuropeptides B/W receptor type 1
NPHS1			X	X				2		NPHN_HUMAN	Nephrin
NPPA			X	X		X		3		ANF_HUMAN	Natriuretic peptides A
NPS					X			1		NPS_HUMAN	Neuropeptide S
NRXN3					X			1		NRX3A_HUMAN	Neurexin-3
NRXN3					X			1		NRX3B_HUMAN	Neurexin-3-beta
NT5C1A		X	X		X			3		5NT1A_HUMAN	Cytosolic 5'-nucleotidase 1A
NTF3							X	1	Tier 2	NTF3_HUMAN	Neurotrophin-3
NTNG1	X							1		NTNG1_HUMAN	Netrin-G1
NTRK1				X				1	Tier 2	NTRK1_HUMAN	High affinity nerve growth factor receptor
NTRK2							X	1	Tier 2	NTRK2_HUMAN	BDNF/NT-3 growth factors receptor
NUDT6				X				1		NUDT6_HUMAN	Nucleoside diphosphate-linked moiety X motif 6
NUP98							X	1		NUP98_HUMAN	Nuclear pore complex protein Nup98-Nup96
NXNL1					X			1		NXNL1_HUMAN	Nucleoredoxin-like protein 1
OGG1		X	X	X		X		4		OGG1_HUMAN	N-glycosylase/DNA lyase
OLFM4			X					1		OLFM4_HUMAN	Olfactomedin-4
OMA1		X						1		OMA1_HUMAN	Metalloendopeptidase OMA1, mitochondrial
OPTN		X		X		X	X	4	Tier 2	OPTN_HUMAN	Optineurin
OR51D1					X			1		O51D1_HUMAN	Olfactory receptor 51D1
OR51E1					X			1		O51E1_HUMAN	Olfactory receptor 51E1
OR52B4					X			1		O52B4_HUMAN	Olfactory receptor 52B4
OR52I1					X			1		O52I1_HUMAN	Olfactory receptor 52I1
OR52I2					X			1		O52I2_HUMAN	Olfactory receptor 52I2
OR52K1					X			1		O52K1_HUMAN	Olfactory receptor 52K1
OR52K2					X			1		O52K2_HUMAN	Olfactory receptor 52K2
OR52M1					X			1		O52M1_HUMAN	Olfactory receptor 52M1
OTOA			X					1		OTOAN_HUMAN	Otoancorin
OXCT2					X			1		SCOT2_HUMAN	Succinyl-CoA:3-ketoacid coenzyme A transferase 2, mitochondrial
P3H3							X	1		P3H3_HUMAN	Prolyl 3-hydroxylase 3
P4HB						X	X	2	Tier 1	PDIA1_HUMAN	Protein disulfide-isomerase
PABPC4					X			1		PABP4_HUMAN	Polyadenylate-binding protein 4
PAG1							X	1		PHAG1_HUMAN	Phosphoprotein associated with glycosphingolipid-enriched microdomains 1
PARD3				X				1		PARD3_HUMAN	Partitioning defective 3 homolog
PARD3B				X				1		PAR3L_HUMAN	Partitioning defective 3 homolog B
PARK2							X	1	Tier 2	PRKN2_HUMAN	E3 ubiquitin-protein ligase parkin
PARK7				X				1	Tier 1	PARK7_HUMAN	Protein deglycase DJ-1
PAWR				X				1		PAWR_HUMAN	PRKC apoptosis WT1 regulator protein
PCP4		X						1		PCP4_HUMAN	Purkinje cell protein 4
PCSK2				X		X		2		NEC2_HUMAN	Neuroendocrine convertase 2
PCSK5					X			1		PCSK5_HUMAN	Proprotein convertase subtilisin/kexin type 5
PDC				X				1		PHOS_HUMAN	Phosducin
PDE10A			X					1		PDE10_HUMAN	cAMP and cAMP-inhibited cGMP 3',5'-cyclic phosphodiesterase 10A
PDE4B			X					1		PDE4B_HUMAN	cAMP-specific 3',5'-cyclic phosphodiesterase 4B
PDGFB				X		X		2		PDGFB_HUMAN	Platelet-derived growth factor subunit B
PDZRN4			X					1		PZRN4_HUMAN	PDZ domain-containing RING finger protein 4
PEX11A			X					1		PX11A_HUMAN	Peroxisomal membrane protein 11A
PFN1		X				X	X	3		PROF1_HUMAN	Profilin-1
PGF				X		X		2		PLGF_HUMAN	Placenta growth factor
PGLS					X			1		6PGL_HUMAN	6-phosphogluconolactonase
PGM3				X				1		AGM1_HUMAN	Phosphoacetylglucosamine mutase
PICALM				X		X		2		PICAL_HUMAN	Phosphatidylinositol-binding clathrin assembly protein
PIGL					X			1		PIGL_HUMAN	N-acetylglucosaminyl-phosphatidylinositol de-N-acetylase
PINK1							X	1	Tier 2	PINK1_HUMAN	Serine/threonine-protein kinase PINK1, mitochondrial
PIWIL2	X							1		PIWL2_HUMAN	Piwi-like protein 2
PKHD1			X					1		PKHD1_HUMAN	Fibrocystin
PNKD				X				1		PNKD_HUMAN	Probable hydrolase PNKD
PNPT1			X		X			2		PNPT1_HUMAN	Polyribonucleotide nucleotidyltransferase 1, mitochondrial
POF1B			X					1		POF1B_HUMAN	Protein POF1B
PON1		X	X	X		X	X	5		PON1_HUMAN	Serum paraoxonase/arylesterase 1
PON2		X	X	X		X	X	5		PON2_HUMAN	Serum paraoxonase/arylesterase 2
PON3		X	X	X		X	X	5		PON3_HUMAN	Serum paraoxonase/lactonase 3
PPARG			X	X		X		3	Tier 2	PPARG_HUMAN	Peroxisome proliferator-activated receptor gamma
PPARGC1A							X	1		PRGC1_HUMAN	Peroxisome proliferator-activated receptor gamma coactivator 1-alpha
PPIA							X	1	Tier 2	PPIA_HUMAN	Peptidyl-prolyl cis-trans isomerase A
PPIE					X			1		PPIE_HUMAN	Peptidyl-prolyl cis-trans isomerase E
PPIF							X	1		PPIF_HUMAN	Peptidyl-prolyl cis-trans isomerase F, mitochondrial
PPM1K			X	X		X		3		PPM1K_HUMAN	Protein phosphatase 1K, mitochondrial
PQLC1					X			1		PQLC1_HUMAN	PQ-loop repeat-containing protein 1
PRNP				X		X	X	3	Tier 2	PRIO_HUMAN	Major prion protein
PRPH		X	X	X		X	X	5		PERI_HUMAN	Peripherin
PRPH2				X			X	2		PRPH2_HUMAN	Peripherin-2
PSEN1		X	X	X		X		4	Tier 2	PSN1_HUMAN	Presenilin-1
PSMA6				X				1	Tier 2	PSA6_HUMAN	Proteasome subunit alpha type-6
PTGER2				X				1	Tier 2	PE2R2_HUMAN	Prostaglandin E2 receptor EP2 subtype
PTGS2				X		X	X	3	Tier 2	PGH2_HUMAN	Prostaglandin G/H synthase 2
PTPN13					X			1		PTN13_HUMAN	Tyrosine-protein phosphatase non-receptor type 13
PTPRF					X			1	Tier 2	PTPRF_HUMAN	Receptor-type tyrosine-protein phosphatase F
PVALB				X			X	2		PRVA_HUMAN	Parvalbumin alpha
PVR		X		X		X		3		PVR_HUMAN	Poliovirus receptor
RAB3GAP2				X				1		RBGPR_HUMAN	Rab3 GTPase-activating protein non-catalytic subunit
RAB5A							X	1		RAB5A_HUMAN	Ras-related protein Rab-5A
RALB			X					1		RALB_HUMAN	Ras-related protein Ral-B
RAMP3		X						1		RAMP3_HUMAN	Receptor activity-modifying protein 3
RAPH1				X				1		RAPH1_HUMAN	Ras-associated and pleckstrin homology domains-containing protein 1
RASGRF1			X					1	Tier 2	RGRF1_HUMAN	Ras-specific guanine nucleotide-releasing factor 1
RBFOX1			X					1		RFOX1_HUMAN	RNA binding protein fox-1 homolog 1
RBMS1		X	X		X			3		RBMS1_HUMAN	RNA-binding motif, single-stranded-interacting protein 1
RBMS2			X					1		RBMS2_HUMAN	RNA-binding motif, single-stranded-interacting protein 2
RCC1				X				1		RCC1_HUMAN	Regulator of chromosome condensation
RD3			X					1		RD3_HUMAN	Protein RD3
RDH14					X			1		RDH14_HUMAN	Retinol dehydrogenase 14
RECK				X		X		2		RECK_HUMAN	Reversion-inducing cysteine-rich protein with Kazal motifs
RET				X				1		RET_HUMAN	Proto-oncogene tyrosine-protein kinase receptor Ret
RNASE2		X						1		RNAS2_HUMAN	Non-secretory ribonuclease
RNF14			X					1		RNF14_HUMAN	E3 ubiquitin-protein ligase RNF14
RNF144A			X					1		R144A_HUMAN	E3 ubiquitin-protein ligase RNF144A
RNF19A		X		X			X	3	Tier 1	RN19A_HUMAN	E3 ubiquitin-protein ligase RNF19A
ROBO4				X		X		2		ROBO4_HUMAN	Roundabout homolog 4
ROD1					X			1		PTBP3_HUMAN	Polypyrimidine tract-binding protein 3
ROS1				X				1		ROS1_HUMAN	Proto-oncogene tyrosine-protein kinase ROS
RPA4			X					1		RFA4_HUMAN	Replication protein A 30 kDa subunit
RRM1							X	1		RIR1_HUMAN	Ribonucleoside-diphosphate reductase large subunit
RRM2							X	1		RIR2_HUMAN	Ribonucleoside-diphosphate reductase subunit M2
RTN4				X			X	2	Tier 2	RTN4_HUMAN	Reticulon-4
RUFY1			X					1	Tier 2	RUFY1_HUMAN	RUN and FYVE domain-containing protein 1
S100A6				X				1		S10A6_HUMAN	Protein S100-A6
S100B				X				1		S100B_HUMAN	Protein S100-B
SATL1			X					1		SATL1_HUMAN	Spermidine/spermine N(1)-acetyltransferase-like protein 1
SCN7A		X	X		X			3	Tier 2	SCN7A_HUMAN	Sodium channel protein type 7 subunit alpha
SCNN1A			X	X		X		3	Tier 2	SCNNA_HUMAN	Amiloride-sensitive sodium channel subunit alpha
SCYL3					X			1		PACE1_HUMAN	Protein-associating with the carboxyl-terminal domain of ezrin
SELE			X	X		X		3		LYAM2_HUMAN	E-selectin
SELL		X	X		X			3		LYAM1_HUMAN	L-selectin
SEMA6A		X	X		X			3		SEM6A_HUMAN	Semaphorin-6A
SERPINE1			X	X		X		3		PAI1_HUMAN	Plasminogen activator inhibitor 1
SETX		X		X		X	X	4		SETX_HUMAN	Probable helicase senataxin
SFRS15					X			1		SFR15_HUMAN	Splicing factor, arginine/serine-rich 15
SFRS7					X			1		SRSF7_HUMAN	Serine/arginine-rich splicing factor 7
SGK1				X				1	Tier 2	SGK1_HUMAN	Serine/threonine-protein kinase Sgk1
SH2B3				X		X		2		SH2B3_HUMAN	SH2B adapter protein 3
SHB			X					1		SHB_HUMAN	SH2 domain-containing adapter protein B
SHISA2			X					1		SHSA2_HUMAN	Protein shisa-2 homolog
SHROOM3			X	X		X		3		SHRM3_HUMAN	Protein Shroom3
SIGMAR1		X				X	X	3		SGMR1_HUMAN	Sigma non-opioid intracellular receptor 1
SIPA1L2			X					1		SI1L2_HUMAN	Signal-induced proliferation-associated 1-like protein 2
SLC10A6					X			1		SOAT_HUMAN	Solute carrier family 10 member 6
SLC11A2				X		X		2		NRAM2_HUMAN	Natural resistance-associated macrophage protein 2
SLC18A3				X				1		VACHT_HUMAN	Vesicular acetylcholine transporter
SLC1A1							X	1		EAA3_HUMAN	Excitatory amino acid transporter 3
SLC1A2		X		X			X	3	Tier 2	EAA2_HUMAN	Excitatory amino acid transporter 2
SLC1A3				X			X	2		EAA1_HUMAN	Excitatory amino acid transporter 1
SLC1A6							X	1		EAA4_HUMAN	Excitatory amino acid transporter 4
SLC1A7			X				X	2		EAA5_HUMAN	Excitatory amino acid transporter 5
SLC27A1					X			1		S27A1_HUMAN	Long-chain fatty acid transport protein 1
SLC33A1							X	1		ACATN_HUMAN	Acetyl-coenzyme A transporter 1
SLC39A11		X	X		X			3		S39AB_HUMAN	Zinc transporter ZIP11
SLC52A3,C20ORF54				X			X	2		S52A3_HUMAN	Solute carrier family 52, riboflavin transporter, member 3
SLCO4A1			X					1		SO4A1_HUMAN	Solute carrier organic anion transporter family member 4A1
SMEK2					X			1		P4R3B_HUMAN	Serine/threonine-protein phosphatase 4 regulatory subunit 3B
SMN2		X	X	X		X	X	5		SMN_HUMAN	Survival motor neuron protein
SNCA				X			X	2	Tier 2	SYUA_HUMAN	Alpha-synuclein
SNCG		X						1		SYUG_HUMAN	Gamma-synuclein
SNRPN							X	1		RSMN_HUMAN	Small nuclear ribonucleoprotein-associated protein N
SOD1		X	X	X	X	X	X	6	Tier 1	SODC_HUMAN	Superoxide dismutase [Cu-Zn]
SOD2		X					X	2		SODM_HUMAN	Superoxide dismutase [Mn], mitochondrial
SORT1							X	1	Tier 1	SORT_HUMAN	Sortilin
SOS1					X			1		SOS1_HUMAN	Son of sevenless homolog 1
SOX5		X						1		SOX5_HUMAN	Transcription factor SOX-5
SPAST		X		X				2		SPAST_HUMAN	Spastin
SPG11		X						1		SPTCS_HUMAN	Spatacsin
SPG7		X						1		SPG7_HUMAN	Paraplegin
SPP1				X		X		2	Tier 2	OSTP_HUMAN	Osteopontin
SPTB			X					1		SPTB1_HUMAN	Spectrin beta chain, erythrocytic
SQSTM1		X		X		X	X	4	Tier 1	SQSTM_HUMAN	Sequestosome-1
SRCIN1							X	1		SRCN1_HUMAN	SRC kinase signaling inhibitor 1
SRGAP2			X					1		SRGP2_HUMAN	SLIT-ROBO Rho GTPase-activating protein 2
SRGAP3			X					1		SRGP3_HUMAN	SLIT-ROBO Rho GTPase-activating protein 3
SRR							X	1		SRR_HUMAN	Serine racemase
SSPO			X					1		SSPO_HUMAN	SCO-spondin
ST3GAL3				X	X	X		3		SIAT6_HUMAN	CMP-N-acetylneuraminate-beta-1,4-galactoside alpha-2,3-sialyltransferase
STAG2			X					1		STAG2_HUMAN	Cohesin subunit SA-2
STC1				X		X		2		STC1_HUMAN	Stanniocalcin-1
STC2				X		X		2		STC2_HUMAN	Stanniocalcin-2
STK36	X				X			2		STK36_HUMAN	Serine/threonine-protein kinase 36
STRADB				X				1		STRAB_HUMAN	STE20-related kinase adapter protein beta
STX17	X							1		STX17_HUMAN	Syntaxin-17
SUGP1							X	1		SUGP1_HUMAN	SURP and G-patch domain-containing protein 1
SUN3,SUNC1	X		X	X		X		4		SUN3_HUMAN	SUN domain-containing protein 3
SUSD1		X	X	X	X	X		5		SUSD1_HUMAN	Sushi domain-containing protein 1
SUSD2						X		1		SUSD2_HUMAN	Sushi domain-containing protein 2
SYP				X			X	2		SYPH_HUMAN	Synaptophysin
SYT9		X						1		SYT9_HUMAN	Synaptotagmin-9
TAB3			X					1		TAB3_HUMAN	TGF-beta-activated kinase 1 and MAP3K7-binding protein 3
TAF12							X	1		TAF12_HUMAN	Transcription initiation factor TFIID subunit 12
TAF15		X		X		X	X	4		RBP56_HUMAN	TATA-binding protein-associated factor 2N
TARDBP		X	X	X		X	X	5	Tier 1	TADBP_HUMAN	TAR DNA-binding protein 43
TBC1D5	X							1		TBCD5_HUMAN	TBC1 domain family member 5
TCEA1			X					1		TCEA1_HUMAN	Transcription elongation factor A protein 1
TGFB1				X		X		2	Tier 2	TGFB1_HUMAN	Transforming growth factor beta-1
TGM1				X				1	Tier 2	TGM1_HUMAN	Protein-glutamine gamma-glutamyltransferase K
TGM2				X				1	Tier 2	TGM2_HUMAN	Protein-glutamine gamma-glutamyltransferase 2
TIAM1			X		X	X		3		TIAM1_HUMAN	T-lymphoma invasion and metastasis-inducing protein 1
TIGD4					X			1		TIGD4_HUMAN	Tigger transposable element-derived protein 4
TLR3				X				1		TLR3_HUMAN	Toll-like receptor 3
TMC3			X					1		TMC3_HUMAN	Transmembrane channel-like protein 3
TMEM106B				X		X	X	3		T106B_HUMAN	Transmembrane protein 106B
TMOD2				X				1		TMOD2_HUMAN	Tropomodulin-2
TNF			X	X		X		3	Tier 2	TNFA_HUMAN	Tumor necrosis factor
TNFSF11			X					1		TNF11_HUMAN	Tumor necrosis factor ligand superfamily member 11
TNFSF13B			X					1		TN13B_HUMAN	Tumor necrosis factor ligand superfamily member 13B
TOX3			X					1		TOX3_HUMAN	TOX high mobility group box family member 3
TP53				X		X		2	Tier 2	P53_HUMAN	Cellular tumor antigen p53
TRAK2				X				1		TRAK2_HUMAN	Trafficking kinesin-binding protein 2
TREM2						X		1		TREM2_HUMAN	Triggering receptor expressed on myeloid cells 2
TRH							X	1		TRH_HUMAN	Pro-thyrotropin-releasing hormone
TRIM2					X			1		TRIM2_HUMAN	Tripartite motif-containing protein 2
TRIM21					X			1		RO52_HUMAN	E3 ubiquitin-protein ligase TRIM21
TRIM49					X			1		TRI49_HUMAN	Tripartite motif-containing protein 49
TRIM68					X			1		TRI68_HUMAN	E3 ubiquitin-protein ligase TRIM68
TRIM77					X			1		TRI77_HUMAN	Tripartite motif-containing protein 77
TRIT1				X	X			2		MOD5_HUMAN	tRNA dimethylallyltransferase, mitochondrial
TRPM2				X				1		TRPM2_HUMAN	Transient receptor potential cation channel subfamily M member 2
TRPM7				X		X		2		TRPM7_HUMAN	Transient receptor potential cation channel subfamily M member 7
TSHZ3			X					1		TSH3_HUMAN	Teashirt homolog 3
TSPO				X				1		TSPOA_HUMAN	Translocator protein
TSPO				X				1		TSPOB_HUMAN	Putative peripheral benzodiazepine receptor-related protein
TTLL4					X			1		TTLL4_HUMAN	Tubulin polyglutamylase TTLL4
TTR					X			1	Tier 2	TTHY_HUMAN	Transthyretin
TXNL1							X	1		TXNL1_HUMAN	Thioredoxin-like protein 1
TXNL4A					X			1		TXN4A_HUMAN	Thioredoxin-like protein 4A
TXNRD1			X	X		X		3	Tier 2	TRXR1_HUMAN	Thioredoxin reductase 1, cytoplasmic
TYMP				X		X		2		TYPH_HUMAN	Thymidine phosphorylase
UBE2H				X		X		2		UBE2H_HUMAN	Ubiquitin-conjugating enzyme E2 H
UBN1							X	1		UBN1_HUMAN	Ubinuclein-1
UBQLN1				X		X	X	3	Tier 1	UBQL1_HUMAN	Ubiquilin-1
UBQLN2		X		X		X	X	4	Tier 1	UBQL2_HUMAN	Ubiquilin-2
UCP3				X				1		UCP3_HUMAN	Mitochondrial uncoupling protein 3
UGCG					X			1		CEGT_HUMAN	Ceramide glucosyltransferase
UNC13A		X	X	X	X	X	X	6		UN13A_HUMAN	Protein unc-13 homolog A
UPF2			X	X		X		3		RENT2_HUMAN	Regulator of nonsense transcripts 2
UPF3A			X					1		REN3A_HUMAN	Regulator of nonsense transcripts 3A
USP6NL	X							1		US6NL_HUMAN	USP6 N-terminal-like protein
UTRN				X				1		UTRO_HUMAN	Utrophin
VAPA							X	1	Tier 2	VAPA_HUMAN	Vesicle-associated membrane protein-associated protein A
VAPB		X	X	X		X	X	5	Tier 2	VAPB_HUMAN	Vesicle-associated membrane protein-associated protein B/C
VCP		X	X	X		X	X	5	Tier 1	TERA_HUMAN	Transitional endoplasmic reticulum ATPase
VDR		X	X	X		X		4		VDR_HUMAN	Vitamin D3 receptor
VEGF,VEGFA		X	X	X		X	X	5		VEGFA_HUMAN	Vascular endothelial growth factor A
VPS54		X	X	X		X	X	5		VPS54_HUMAN	Vacuolar protein sorting-associated protein 54
WDR93			X					1		WDR93_HUMAN	WD repeat-containing protein 93
WNT10B				X		X		2		WN10B_HUMAN	Protein Wnt-10b
WNT5A				X		X		2		WNT5A_HUMAN	Protein Wnt-5a
XIAP				X				1	Tier 2	XIAP_HUMAN	E3 ubiquitin-protein ligase XIAP
XRCC1				X		X		2		XRCC1_HUMAN	DNA repair protein XRCC1
YWHAQ				X				1	Tier 2	1433T_HUMAN	14-3-3 protein theta
YWHAZ			X					1		1433Z_HUMAN	14-3-3 protein zeta/delta
ZFP64		X	X	X	X	X		5		ZF64A_HUMAN	Zinc finger protein 64 homolog, isoforms 1 and 2
ZFP64		X	X	X	X	X		5		ZF64B_HUMAN	Zinc finger protein 64 homolog, isoforms 3 and 4
ZNF142					X			1		ZN142_HUMAN	Zinc finger protein 142
ZNF385B			X					1		Z385B_HUMAN	Zinc finger protein 385B
ZNF496			X					1		ZN496_HUMAN	Zinc finger protein 496
ZNF512B		X		X		X	X	4		Z512B_HUMAN	Zinc finger protein 512B
ZNF519			X	X		X		3		ZN519_HUMAN	Zinc finger protein 519
ZNF704				X		X		2		ZN704_HUMAN	Zinc finger protein 704
ZNF746		X	X		X			3		ZN746_HUMAN	Zinc finger protein 746
ZNF767					X			1		ZN767_HUMAN	Protein ZNF767
ZNF777					X			1		ZN777_HUMAN	Zinc finger protein 777
ZNF828			X					1		CHAP1_HUMAN	Chromosome alignment-maintaining phosphoprotein 1
ZSWIM7	X							1		ZSWM7_HUMAN	Zinc finger SWIM domain-containing protein 7

## Sheet: Network_support
Network_support	UniProtID	UniProtAC	GeneName	Protein Description
Tier2	SCNNA_HUMAN	P37088	SCNN1A	Amiloride-sensitive sodium channel subunit alpha
Tier2	HSPB1_HUMAN	P04792	HSPB1	Heat shock protein beta-1
Tier1	LIPC_HUMAN	P11150	LIPC	Hepatic triacylglycerol lipase
Tier2	HSPB3_HUMAN	Q12988	HSPB3	Heat shock protein beta-3
Tier1	APOB_HUMAN	P04114	APOB	Apolipoprotein B-100
Tier2	MT2_HUMAN	P02795	MT2A	Metallothionein-2
Tier2	NTRK1_HUMAN	P04629	NTRK1	High affinity nerve growth factor receptor
Tier1	APOE_HUMAN	P02649	APOE	Apolipoprotein E
Tier2	GFAP_HUMAN	P14136	GFAP	Glial fibrillary acidic protein
Tier2	NTF3_HUMAN	P20783	NTF3	Neurotrophin-3
Tier2	PINK1_HUMAN	Q9BXM7	PINK1	Serine/threonine-protein kinase PINK1, mitochondrial
Tier1	RN19A_HUMAN	Q9NV58	RNF19A	E3 ubiquitin-protein ligase RNF19A
Tier2	E41L3_HUMAN	Q9Y2J2	EPB41L3	Band 4.1-like protein 3
Tier2	RUFY1_HUMAN	Q96T51	RUFY1	RUN and FYVE domain-containing protein 1
Tier2	CAV1_HUMAN	Q03135	CAV1	Caveolin-1
Tier2	CYC_HUMAN	P99999	CYCS	Cytochrome c
Tier1	SODC_HUMAN	P00441	SOD1	Superoxide dismutase [Cu-Zn]
Tier2	GRM1_HUMAN	Q13255	GRM1	Metabotropic glutamate receptor 1
Tier2	TNR16_HUMAN	P08138	NGFR	Tumor necrosis factor receptor superfamily member 16
Tier2	BDNF_HUMAN	P23560	BDNF	Brain-derived neurotrophic factor
Tier1	ATX2_HUMAN	Q99700	ATXN2	Ataxin-2
Tier2	GRN_HUMAN	P28799	GRN	Granulins
Tier2	CRYAB_HUMAN	P02511	CRYAB	Alpha-crystallin B chain
Tier2	HSPB8_HUMAN	Q9UJY1	HSPB8	Heat shock protein beta-8
Tier2	OPTN_HUMAN	Q96CV9	OPTN	Optineurin
Tier2	RTN4_HUMAN	Q9NQC3	RTN4	Reticulon-4
Tier2	TTHY_HUMAN	P02766	TTR	Transthyretin
Tier1	APOA4_HUMAN	P06727	APOA4	Apolipoprotein A-IV
Tier1	CCS_HUMAN	O14618	CCS	Copper chaperone for superoxide dismutase
Tier1	HECW1_HUMAN	Q76N89	HECW1	E3 ubiquitin-protein ligase HECW1
Tier2	VAPA_HUMAN	Q9P0L0	VAPA	Vesicle-associated membrane protein-associated protein A
Tier2	XIAP_HUMAN	P98170	XIAP	E3 ubiquitin-protein ligase XIAP
Tier2	GRIA1_HUMAN	P42261	GRIA1	Glutamate receptor 1
Tier1	ROA1_HUMAN	P09651	HNRNPA1	Heterogeneous nuclear ribonucleoprotein A1
Tier2	PRIO_HUMAN	P04156	PRNP	Major prion protein
Tier2	NGF_HUMAN	P01138	NGF	Beta-nerve growth factor
Tier1	HDAC6_HUMAN	Q9UBN7	HDAC6	Histone deacetylase 6
Tier2	1433T_HUMAN	P27348	YWHAQ	14-3-3 protein theta
Tier2	CNTFR_HUMAN	P26992	CNTFR	Ciliary neurotrophic factor receptor subunit alpha
Tier1	BCL2_HUMAN	P10415	BCL2	Apoptosis regulator Bcl-2
Tier2	ATX3_HUMAN	P54252	ATXN3	Ataxin-3
Tier2	NOS1_HUMAN	P29475	NOS1	Nitric oxide synthase, brain
Tier2	KCIP4_HUMAN	Q6PIL6	KCNIP4	Kv channel-interacting protein 4
Tier1	CNTF_HUMAN	P26441	CNTF	Ciliary neurotrophic factor
Tier2	GRIK1_HUMAN	P39086	GRIK1	Glutamate receptor ionotropic, kainate 1
Tier2	HD_HUMAN	P42858	HTT	Huntingtin
Tier2	PSA6_HUMAN	P60900	PSMA6	Proteasome subunit alpha type-6
Tier2	HSPB2_HUMAN	Q16082	HSPB2	Heat shock protein beta-2
Tier2	ADDA_HUMAN	P35611	ADD1	Alpha-adducin
Tier2	SGK1_HUMAN	O00141	SGK1	Serine/threonine-protein kinase Sgk1
Tier2	EPHA4_HUMAN	P54764	EPHA4	Ephrin type-A receptor 4
Tier2	GRIK2_HUMAN	Q13002	GRIK2	Glutamate receptor ionotropic, kainate 2
Tier2	APAF_HUMAN	O14727	APAF1	Apoptotic protease-activating factor 1
Tier2	GRIA4_HUMAN	P48058	GRIA4	Glutamate receptor 4
Tier2	NOS3_HUMAN	P29474	NOS3	Nitric oxide synthase, endothelial
Tier2	CNTN4_HUMAN	Q8IWV2	CNTN4	Contactin-4
Tier2	ACHB4_HUMAN	P30926	CHRNB4	Neuronal acetylcholine receptor subunit beta-4
Tier2	GRIA3_HUMAN	P42263	GRIA3	Glutamate receptor 3
Tier1	APOC3_HUMAN	P02656	APOC3	Apolipoprotein C-III
Tier2	OSTP_HUMAN	P10451	SPP1	Osteopontin
Tier1	FUS_HUMAN	P35637	FUS	RNA-binding protein FUS
Tier2	NFL_HUMAN	P07196	NEFL	Neurofilament light polypeptide
Tier1	LDLR_HUMAN	P01130	LDLR	Low-density lipoprotein receptor
Tier2	DMD_HUMAN	P11532	DMD	Dystrophin
Tier2	CDK5_HUMAN	Q00535	CDK5	Cyclin-dependent-like kinase 5
Tier2	NPBW1_HUMAN	P48145	NPBWR1	Neuropeptides B/W receptor type 1
Tier2	ADRB2_HUMAN	P07550	ADRB2	Beta-2 adrenergic receptor
Tier2	FBLN3_HUMAN	Q12805	EFEMP1	EGF-containing fibulin-like extracellular matrix protein 1
Tier2	CLUS_HUMAN	P10909	CLU	Clusterin
Tier2	ROA2_HUMAN	P22626	HNRNPA2B1	Heterogeneous nuclear ribonucleoproteins A2/B1
Tier2	VAPB_HUMAN	O95292	VAPB	Vesicle-associated membrane protein-associated protein B/C
Tier2	NMDE1_HUMAN	Q12879	GRIN2A	Glutamate receptor ionotropic, NMDA 2A
Tier2	P53_HUMAN	P04637	TP53	Cellular tumor antigen p53
Tier1	DERL1_HUMAN	Q9BUN8	DERL1	Derlin-1
Tier2	NMDE2_HUMAN	Q13224	GRIN2B	Glutamate receptor ionotropic, NMDA 2B
Tier2	NTRK2_HUMAN	Q16620	NTRK2	BDNF/NT-3 growth factors receptor
Tier2	GRIA2_HUMAN	P42262	GRIA2	Glutamate receptor 2
Tier1	PARK7_HUMAN	Q99497	PARK7	Protein deglycase DJ-1
Tier1	TAU_HUMAN	P10636	MAPT	Microtubule-associated protein tau
Tier2	IBP2_HUMAN	P18065	IGFBP2	Insulin-like growth factor-binding protein 2
Tier1	DCTN1_HUMAN	Q14203	DCTN1	Dynactin subunit 1
Tier2	NETO1_HUMAN	Q8TDF5	NETO1	Neuropilin and tolloid-like protein 1
Tier1	APOA_HUMAN	P08519	LPA	Apolipoprotein(a)
Tier2	TRXR1_HUMAN	Q16881	TXNRD1	Thioredoxin reductase 1, cytoplasmic
Tier2	THRB_HUMAN	P00734	F2	Prothrombin
Tier2	MPRD_HUMAN	P20645	M6PR	Cation-dependent mannose-6-phosphate receptor
Tier1	NFM_HUMAN	P07197	NEFM	Neurofilament medium polypeptide
Tier2	SCN7A_HUMAN	Q01118	SCN7A	Sodium channel protein type 7 subunit alpha
Tier1	TERA_HUMAN	P55072	VCP	Transitional endoplasmic reticulum ATPase
Tier2	DLGP1_HUMAN	O14490	DLGAP1	Disks large-associated protein 1
Tier1	ARG28_HUMAN	Q8N1W1	ARHGEF28	Rho guanine nucleotide exchange factor 28
Tier2	GRM5_HUMAN	P41594	GRM5	Metabotropic glutamate receptor 5
Tier2	ADA10_HUMAN	O14672	ADAM10	Disintegrin and metalloproteinase domain-containing protein 10
Tier2	CASP1_HUMAN	P29466	CASP1	Caspase-1
Tier2	MMP1_HUMAN	P03956	MMP1	Interstitial collagenase
Tier2	PPARG_HUMAN	P37231	PPARG	Peroxisome proliferator-activated receptor gamma
Tier2	ACHA3_HUMAN	P32297	CHRNA3	Neuronal acetylcholine receptor subunit alpha-3
Tier2	KC1G3_HUMAN	Q9Y6M4	CSNK1G3	Casein kinase I isoform gamma-3
Tier2	M3K5_HUMAN	Q99683	MAP3K5	Mitogen-activated protein kinase kinase kinase 5
Tier1	LIPL_HUMAN	P06858	LPL	Lipoprotein lipase
Tier2	EXOC4_HUMAN	Q96A65	EXOC4	Exocyst complex component 4
Tier2	PRKN2_HUMAN	O60260	PARK2	E3 ubiquitin-protein ligase parkin
Tier2	BC11B_HUMAN	Q9C0K0	BCL11B	B-cell lymphoma/leukemia 11B
Tier2	ACHA4_HUMAN	P43681	CHRNA4	Neuronal acetylcholine receptor subunit alpha-4
Tier1	SORT_HUMAN	Q99523	SORT1	Sortilin
Tier2	DNJB1_HUMAN	P25685	DNAJB1	DnaJ homolog subfamily B member 1
Tier1	CASP3_HUMAN	P42574	CASP3	Caspase-3
Tier2	PPIA_HUMAN	P62937	PPIA	Peptidyl-prolyl cis-trans isomerase A
Tier2	EPHA3_HUMAN	P29320	EPHA3	Ephrin type-A receptor 3
Tier2	PGH2_HUMAN	P35354	PTGS2	Prostaglandin G/H synthase 2
Tier2	A4_HUMAN	P05067	APP	Amyloid beta A4 protein
Tier2	IBP5_HUMAN	P24593	IGFBP5	Insulin-like growth factor-binding protein 5
Tier2	NFH_HUMAN	P12036	NEFH	Neurofilament heavy polypeptide
Tier2	PE2R2_HUMAN	P43116	PTGER2	Prostaglandin E2 receptor EP2 subtype
Tier2	TGFB1_HUMAN	P01137	TGFB1	Transforming growth factor beta-1
Tier2	IGF1_HUMAN	P05019	IGF1	Insulin-like growth factor I
Tier2	KCNN3_HUMAN	Q9UGI6	KCNN3	Small conductance calcium-activated potassium channel protein 3
Tier2	KCMA1_HUMAN	Q12791	KCNMA1	Calcium-activated potassium channel subunit alpha-1
Tier2	LRRK2_HUMAN	Q5S007	LRRK2	Leucine-rich repeat serine/threonine-protein kinase 2
Tier2	EAA2_HUMAN	P43004	SLC1A2	Excitatory amino acid transporter 2
Tier2	TGM1_HUMAN	P22735	TGM1	Protein-glutamine gamma-glutamyltransferase K
Tier2	PTPRF_HUMAN	P10586	PTPRF	Receptor-type tyrosine-protein phosphatase F
Tier1	SCG1_HUMAN	P05060	CHGB	Secretogranin-1
Tier2	CAD10_HUMAN	Q9Y6N8	CDH10	Cadherin-10
Tier1	UBQL2_HUMAN	Q9UHD9	UBQLN2	Ubiquilin-2
Tier2	CYTC_HUMAN	P01034	CST3	Cystatin-C
Tier2	PSN1_HUMAN	P49768	PSEN1	Presenilin-1
Tier2	HYPM_HUMAN	O75409	HYPM	Huntingtin-interacting protein M
Tier2	MAG_HUMAN	P20916	MAG	Myelin-associated glycoprotein
Tier2	NOS2_HUMAN	P35228	NOS2	Nitric oxide synthase, inducible
Tier1	HS3SA_HUMAN	Q9Y663	HS3ST3A1	Heparan sulfate glucosamine 3-O-sulfotransferase 3A1
Tier1	MYLIP_HUMAN	Q8WY64	MYLIP	E3 ubiquitin-protein ligase MYLIP
Tier1	UBQL1_HUMAN	Q9UMX0	UBQLN1	Ubiquilin-1
Tier1	TADBP_HUMAN	Q13148	TARDBP	TAR DNA-binding protein 43
Tier1	CETP_HUMAN	P11597	CETP	Cholesteryl ester transfer protein
Tier2	ALS_HUMAN	P35858	IGFALS	Insulin-like growth factor-binding protein complex acid labile subunit
Tier2	TGM2_HUMAN	P21980	TGM2	Protein-glutamine gamma-glutamyltransferase 2
Tier2	CAD13_HUMAN	P55290	CDH13	Cadherin-13
Tier2	TNFA_HUMAN	P01375	TNF	Tumor necrosis factor
Tier2	DSG2_HUMAN	Q14126	DSG2	Desmoglein-2
Tier1	PDIA1_HUMAN	P07237	P4HB	Protein disulfide-isomerase
Tier2	SYUA_HUMAN	P37840	SNCA	Alpha-synuclein
Tier1	SQSTM_HUMAN	Q13501	SQSTM1	Sequestosome-1
Tier2	RGRF1_HUMAN	Q13972	RASGRF1	Ras-specific guanine nucleotide-releasing factor 1
