# Supplementary material for: A molecular view of amyotrophic lateral sclerosis through the lens of interaction network modules
Source: PLoS One. 2022 May 16;17(5):e0268159. doi: 10.1371/journal.pone.0268159 (PMC9109932; doi:10.1371/journal.pone.0268159)
Supplement: S2 Table — (XLSX) [file pone.0268159.s002.xlsx]

## Sheet: Sheet1
UniProtID	ALSoD	HuGE_Navigator_Genopedia	text_mining	Tier1/2 presense
FAK2_HUMAN		1		module117,module224
DNJB2_HUMAN			1	module17,module65
RTN4R_HUMAN		1		module174
NTF4_HUMAN			1	module174,module282
KIF1B_HUMAN			1	module184
CATD_HUMAN		1		module184,module282,module66
TRFE_HUMAN		1		module198
MTAP2_HUMAN			1	module224
CALB1_HUMAN			1	module227
GRIK5_HUMAN		1		module275
TRAF6_HUMAN		1		module282,module65
HSP74_HUMAN			1	module282,module99
TITIN_HUMAN		1		module42
BAG3_HUMAN			1	module42
HDAC4_HUMAN			1	module65
JUN_HUMAN		1		module66
CTNB1_HUMAN		1		module86
ABCC8_HUMAN		1
ABCC9_HUMAN		1
ANX11_HUMAN		1	1
ARHG1_HUMAN		1
BTNL2_HUMAN		1
CF410_HUMAN		1	1
TSBP1_HUMAN		1
ER6L2_HUMAN		1
CCL18_HUMAN		1
CCNF_HUMAN		1	1
CELF1_HUMAN		1
CAF1A_HUMAN		1
CHC10_HUMAN	1	1	1
CHCH2_HUMAN		1	1
CHIT1_HUMAN		1	1
COG2_HUMAN		1
COQ2_HUMAN		1
COX8A_HUMAN		1
CATC_HUMAN		1	1
CX3C1_HUMAN	1	1
PERE_HUMAN		1
FERM2_HUMAN		1
GGNB2_HUMAN		1
AGAL_HUMAN		1
NAT8_HUMAN		1
GLE1_HUMAN	1	1	1
GPNMB_HUMAN		1	1
GSTP1_HUMAN		1
DRA_HUMAN		1
2B11_HUMAN		1
2B13_HUMAN		1
2B14_HUMAN		1
2B17_HUMAN		1
2B18_HUMAN		1
2B19_HUMAN		1
2B1A_HUMAN		1
2B1B_HUMAN		1
2B1C_HUMAN		1
2B1D_HUMAN		1
2B1E_HUMAN		1
2B1F_HUMAN		1
2B1G_HUMAN		1
DRB5_HUMAN		1
HNMT_HUMAN		1
IDUA_HUMAN		1
IL6_HUMAN		1
KCJ11_HUMAN		1
KCNJ8_HUMAN		1
PACER_HUMAN		1
MAF_HUMAN		1
MGA_HUMAN		1
MIS_HUMAN		1
MOBP_HUMAN		1
MYT1_HUMAN		1
MUTA_HUMAN		1
NEK1_HUMAN		1	1
NMD3_HUMAN		1
NANO3_HUMAN		1
NR1H2_HUMAN		1
5NT3B_HUMAN		1
PH4H_HUMAN		1
PARP1_HUMAN		1
PB1_HUMAN		1
PKHG5_HUMAN	1	1
RAB38_HUMAN		1
RAB7L_HUMAN		1
RBMS3_HUMAN		1
SCFD1_HUMAN		1
SIR2_HUMAN		1
SIR3_HUMAN		1
VMAT2_HUMAN		1
SMCA5_HUMAN		1
SMUG1_HUMAN		1
SGPP1_HUMAN		1
SRBP1_HUMAN		1
CREST_HUMAN	1	1	1
STK39_HUMAN		1
SYNE1_HUMAN	1	1
TBK1_HUMAN	1	1	1
TIA1_HUMAN		1	1
TBA4A_HUMAN	1	1	1
ZNHI3_HUMAN		1
GARS_HUMAN	1
SARM1_HUMAN	1
ADA_HUMAN			1
ANM1_HUMAN			1
AT8OS_HUMAN			1
ATF6A_HUMAN			1
ATLA1_HUMAN			1
CASPC_HUMAN			1
CH3L1_HUMAN			1
DNM1L_HUMAN			1
ECE1_HUMAN			1
EFGM_HUMAN			1
G3BP1_HUMAN			1
GL8D1_HUMAN			1
IF2A_HUMAN			1
LRP4_HUMAN			1
MADD_HUMAN			1
MFN2_HUMAN			1
MIRO1_HUMAN			1
MUSK_HUMAN			1
NRG1_HUMAN			1
OXR1_HUMAN			1
PABP1_HUMAN			1
PR15A_HUMAN			1
PRKN_HUMAN			1
PURA_HUMAN			1
RAB8A_HUMAN			1
RBM45_HUMAN			1
RCC1L_HUMAN			1
RIPK1_HUMAN			1
RMD3_HUMAN			1
SCAR3_HUMAN			1
SEM3A_HUMAN			1
SFPQ_HUMAN			1
SMCR8_HUMAN			1
TFEB_HUMAN			1
TNPO1_HUMAN			1
UBC_HUMAN			1
ULK1_HUMAN			1
VRK1_HUMAN			1
WDR41_HUMAN			1
